# Supplementary material
Source: Springer Nature journal article supplement (https://www.springermedizin.de/resource/supplementary/12882_2013_809_MOESM13_ESM.pdf/9454356)

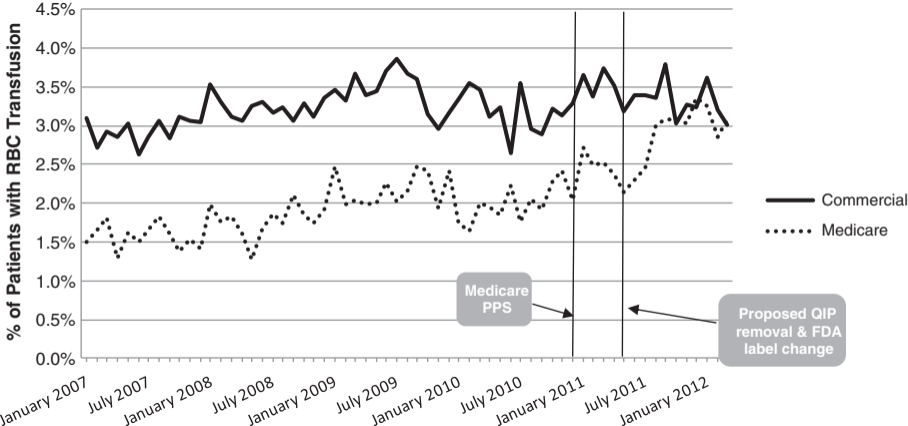

Supplement: MOESM13 [file 9454356]
